# Supplementary material
Source: Springer Nature journal article supplement (https://www.springermedizin.de/resource/supplementary/13054_2010_9527_MOESM1_ESM.pdf/9706332)
Supplement: MOESM1 [file 9706332]

140 patients randomized

```
graph TD; A[140 patients randomized] --> B[103 patients included in the statistical analysis]; A --> C[27 patients excluded because of less than 48 hours receiving mechanical ventilation]; A --> D[10 patients excluded because of preexisting renal impairment (see online supplement).];
```

27 patients excluded because of less than 48 hours receiving mechanical ventilation

10 patients excluded because of preexisting renal impairment (see online supplement).

103 patients included in the statistical analysis
